# Supplementary material for: Two 2D microporous MOFs based on bent carboxylates and a linear spacer for selective CO2adsorption
Source: Royal Society of Chemistry journal article supplement (doi:10.1039/c8ce01925h), 2018-12-03
Supplement: c8ce01925h1.pdf [file c8ce01925h1.pdf]

Revised ESI for manuscript (CE-ART-11-2018-001925.R1)

## Electronic Supplementary Information (ESI)

### **Two 2D microporous MOFs based on bent carboxylates and linear spacer for selective CO<sub>2</sub> adsorption**

Arun Pal<sup>†</sup>, Antarip Mitra<sup>†</sup>, Santanu Chand<sup>†</sup>, Jian-Bin Lin<sup>‡</sup> and Madhab C. Das<sup>†\*</sup>

<sup>†</sup>*Department of Chemistry, Indian Institute of Technology Kharagpur, 721302, W.B., India.*

<sup>‡</sup>*Department of Chemistry, University of Calgary, Calgary, Alberta T2N 1N4, Canada.*

*E-mail: mcdas@chem.iitkgp.ac.in*

---

**Physical Measurements.** FTIR spectra were measured on a Perkin-Elmer RX1 spectrophotometer in the wavenumber range of 4000 to 400 cm<sup>-1</sup>. Elemental analyses (C, H, N and S) were carried out on an Elementar, Vario Micro Cube elemental analyzer. Powder XRD data were collected with *Cu-K<sub>α</sub>* radiation on a Bruker D8 Advance diffractometer in the range of  $2\theta = 5-50^\circ$ . Thermogravimetric analysis (TGA) experiments were studied on a TG 209 F3 Tarsus (Netzsch) from room temperature to 800 °C at 5 °C/min under N<sub>2</sub> atmosphere. <sup>1</sup>H, <sup>13</sup>C-NMR spectrum was recorded on a Bruker Avance II 400 spectrometer. Mass (MALDI-TOF) spectrum was recorded using a Bruker MALDI-TOF/TOF mass spectrometer. Gas sorption experiments were tested on a Micromeritics 3-Flex Surface Characterization Analyzer at different temperatures. To remove all the guest solvents in the framework, the fresh samples were first solvent-exchanged with dry chloroform at least 10 times within two days and degassed at 343 K for 12 h until the outgas rate was 5 μmHg/min prior to measurements. The sorption measurement was maintained at 77 K under liquid nitrogen and at 195 K by using methanol/dry ice mixture. A chiller was used for adsorption isotherms at 273 and 295 K, respectively.

**Single Crystal X-ray Diffraction.** The single-crystal X-ray diffraction data were collected with *Mo-K<sub>α</sub>* radiation ( $\lambda = 0.71073 \text{ \AA}$ ) on a Bruker SMART APEX II CCD diffractometer at 298 K for **1** and **2**. The absorption correction was carried out using the SADABS program. The structures were solved by direct methods, and the non-hydrogen atoms were refined anisotropically by the SHELXTL software package with full-matrix least-squares procedure.<sup>1</sup> The highly disordered guest solvent molecules for **2** in void volume can be removed by PLATON/SQUEEZE.<sup>2</sup> The crystal, refinement data, selected bond lengths and angles of complexes **1-2** are summarized in Table S1 and S2, ESI, respectively.

**Table S1:** Crystal data and structure refinements for MOFs **1-2**.

|                                               | <b>1</b>                                                        | <b>2</b>                                                                                      |
|-----------------------------------------------|-----------------------------------------------------------------|-----------------------------------------------------------------------------------------------|
| Empirical formula                             | C <sub>29</sub> H <sub>25</sub> CdN <sub>5</sub> O <sub>7</sub> | C <sub>40</sub> H <sub>26</sub> N <sub>4</sub> O <sub>13</sub> S <sub>2</sub> Zn <sub>2</sub> |
| Formula weight                                | 667.94                                                          | 965.51                                                                                        |
| Temperature (K)                               | 298 (1)                                                         | 298 (1)                                                                                       |
| Radiation                                     | Mo-K $\alpha$                                                   | Mo-K $\alpha$                                                                                 |
| Wavelength ( $\lambda$ )                      | 0.71073Å                                                        | 0.71073Å                                                                                      |
| Crystal system                                | Triclinic                                                       | Triclinic                                                                                     |
| Space group                                   | $P\bar{1}$                                                      | $P1$                                                                                          |
| $a$ [Å]                                       | 9.949 (5)                                                       | 9.894 (5)                                                                                     |
| $b$ [Å]                                       | 11.344 (5)                                                      | 12.719 (5)                                                                                    |
| $c$ [Å]                                       | 12.395 (5)                                                      | 12.789 (5)                                                                                    |
| $\alpha$ [°]                                  | 98.565 (5)                                                      | 60.037 (5)                                                                                    |
| $\beta$ [°]                                   | 90.042 (5)                                                      | 77.603 (5)                                                                                    |
| $\gamma$ [°]                                  | 91.149 (5)                                                      | 83.457 (5)                                                                                    |
| Volume [Å <sup>3</sup> ]                      | 1383.0 (11)                                                     | 1361.7 (10)                                                                                   |
| $Z$                                           | 2                                                               | 1                                                                                             |
| Density (calculated)<br>[Mg/m <sup>3</sup> ]  | 1.604                                                           | 1.177                                                                                         |
| Absorption coefficient<br>[mm <sup>-1</sup> ] | 0.847                                                           | 1.011                                                                                         |
| F (000)                                       | 676                                                             | 490                                                                                           |
| Refl. used [ $I > 2\sigma(I)$ ]               | 3921                                                            | 4218                                                                                          |
| Independent reflections                       | 6908                                                            | 6001                                                                                          |
| $R_{\text{int}}$                              | 0.0730                                                          | 0.0542                                                                                        |
| Refinement method                             | full-matrix least squares on $F^2$                              | full-matrix least squares on $F^2$                                                            |
| GOF                                           | 0.961                                                           | 1.019                                                                                         |
| Final $R$ indices [ $I > 2\sigma(I)$ ]        | $R_1 = 0.0527$ ; $wR_2 = 0.0977$                                | $R_1 = 0.0617$ ; $wR_2 = 0.1734$                                                              |
| $R$ indices (all data)                        | $R_1 = 0.1283$ ; $wR_2 = 0.1266$                                | $R_1 = 0.0889$ ; $wR_2 = 0.1893$                                                              |
| CCDC No                                       | 1877080                                                         | 1877081                                                                                       |

**Table S2:** Selected Bond Distances (Å) and Bond Angles (°) in **1 2**.

|     |    | <b>1</b> |     |     |          |
|-----|----|----------|-----|-----|----------|
| Cd1 | O1 | 2.327(4) | Cd1 | O2  | 2.337(3) |
| Cd1 | N1 | 2.357(4) | Cd1 | O3  | 2.369(3) |
| Cd1 | O1 | 2.585(3) |     |     |          |
|     |    |          |     | Cd1 | N4       |
|     |    |          |     |     | 2.339(4) |
|     |    |          |     | Cd1 | O4       |
|     |    |          |     |     | 2.397(3) |

|    |     |    |            |    |     |    |           |
|----|-----|----|------------|----|-----|----|-----------|
| O1 | Cd1 | O2 | 124.28(12) | O2 | Cd1 | O4 | 88.25(12) |
| O1 | Cd1 | N4 | 91.67(14)  | N4 | Cd1 | O4 | 86.79(13) |
| O2 | Cd1 | N4 | 99.77(13)  | N1 | Cd1 | O4 | 96.85(13) |
| O1 | Cd1 | N1 | 83.31(13)  | O3 | Cd1 | O4 | 54.74(11) |
| O2 | Cd1 | N1 | 83.99(12)  | O1 | Cd1 | O1 | 74.46(12) |

|           |            |           |            |
|-----------|------------|-----------|------------|
| N4 Cd1 N1 | 174.87(15) | O2 Cd1 O1 | 52.58(11)  |
| O1 Cd1 O3 | 92.55(12)  | N4 Cd1 O1 | 85.98(12)  |
| O2 Cd1 O3 | 140.40(13) | N1 Cd1 O1 | 93.65(12)  |
| N4 Cd1 O3 | 92.36(13)  | O3 Cd1 O1 | 166.83(11) |
| N1 Cd1 O3 | 86.84(13)  | O4 Cd1 O1 | 138.01(11) |
| O1 Cd1 O4 | 147.10(11) |           |            |

| 2      |           |        |           |        |           |
|--------|-----------|--------|-----------|--------|-----------|
| Zn1 O3 | 2.011(10) | Zn1 O7 | 2.064(9)  | Zn1 O5 | 2.068(8)  |
| Zn1 O1 | 2.085(10) | Zn1 N4 | 2.125(10) | Zn2 N1 | 1.910(13) |
| Zn2 O4 | 2.006(11) | Zn2 O6 | 2.044(10) | Zn2 O8 | 2.063(9)  |
| Zn2 O2 | 2.083(11) |        |           |        |           |

|           |          |           |          |
|-----------|----------|-----------|----------|
| O3 Zn1 O7 | 87.8(4)  | N1 Zn2 O4 | 101.2(5) |
| O3 Zn1 O5 | 161.0(4) | N1 Zn2 O6 | 102.9(5) |
| O7 Zn1 O5 | 87.0(4)  | O4 Zn2 O6 | 155.6(4) |
| O3 Zn1 O1 | 91.8(4)  | N1 Zn2 O8 | 99.7(5)  |
| O7 Zn1 O1 | 158.5(4) | O4 Zn2 O8 | 87.1(4)  |
| O5 Zn1 O1 | 86.4(4)  | O6 Zn2 O8 | 85.2(4)  |
| O3 Zn1 N4 | 101.1(4) | N1 Zn2 O2 | 101.1(5) |
| O7 Zn1 N4 | 93.1(4)  | O4 Zn2 O2 | 91.0(5)  |
| O5 Zn1 N4 | 97.4(4)  | O6 Zn2 O2 | 88.1(4)  |
| O1 Zn1 N4 | 108.1(4) | O8 Zn2 O2 | 159.1(4) |

**Table S3:** Non-bonding interactions in **1-2**.

| Complex-1    |              |              |           |
|--------------|--------------|--------------|-----------|
| D-H...A      | d(H...A) (Å) | D(D...A) (Å) | ∠ DHA (°) |
| C6 H6...O7   | 2.615        | 3.361        | 137.54    |
| C12 H12...O6 | 2.702        | 3.342        | 126.68    |
| C16 H16...O7 | 2.553        | 3.201        | 127.16    |
| C23 H23...O4 | 2.577        | 3.417        | 150.42    |
| N3 H3N3...O4 | 2.125        | 2.919        | 167.12    |

| Complex-2     |              |              |           |
|---------------|--------------|--------------|-----------|
| D-H...A       | d(H...A) (Å) | D(D...A) (Å) | ∠ DHA (°) |
| C2 H2...O1    | 2.605        | 3.404        | 144.41    |
| C3 H3...O11   | 2.553        | 3.411        | 153.34    |
| C5 H5...O12   | 2.571        | 3.045        | 112.06    |
| C9 H9...O5    | 2.510        | 3.154        | 126.52    |
| C11 H11...O8  | 2.330        | 3.244        | 167.53    |
| C21 H21...O13 | 2.424        | 3.276        | 152.31    |

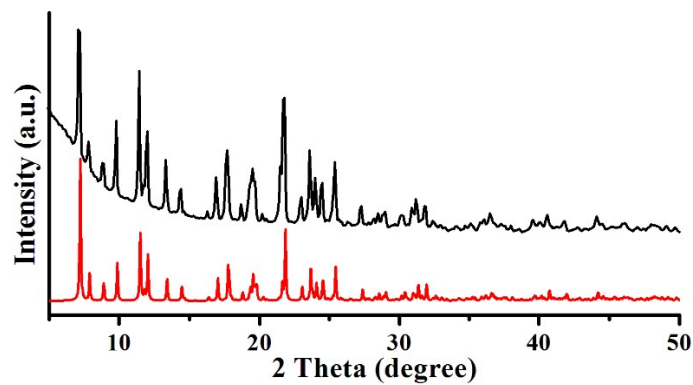

**Figure S1:** Simulated (red) and as synthesized (black) PXRd pattern of **1**.

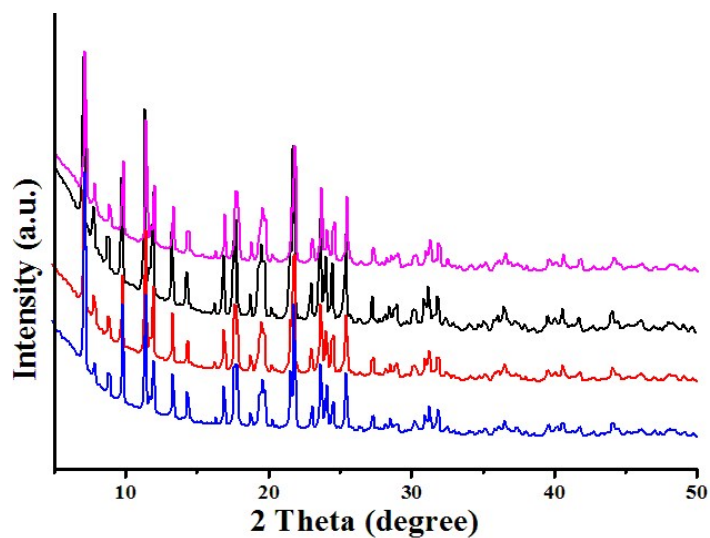

**Figure S2:** As synthesized (blue), chloroform exchanged (red), desolvated (black) and after CO<sub>2</sub> adsorption (magenta) PXRd pattern of **1**.

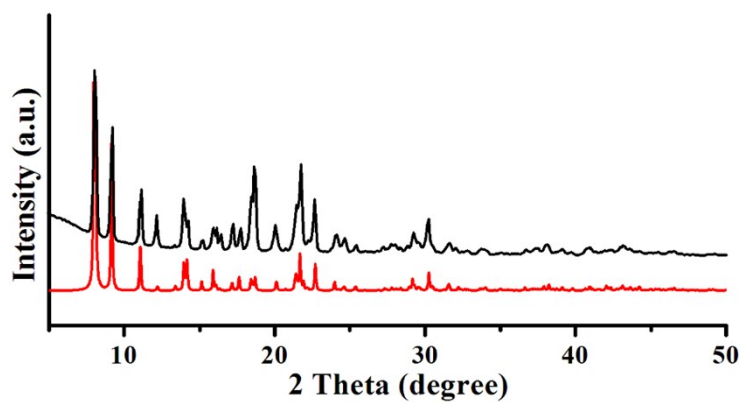

**Figure S3:** Simulated (red) and as synthesized (black) PXRd pattern of **2**.

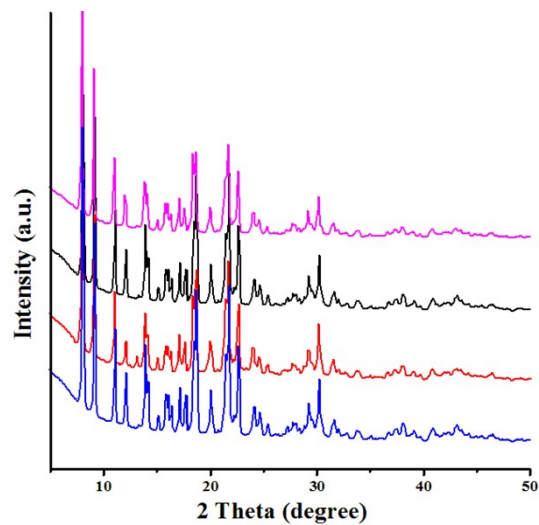

**Figure S4:** As synthesized (blue), chloroform exchanged (red), desolvated (black) and after CO<sub>2</sub> adsorption (magenta) PXRD pattern of **2**.

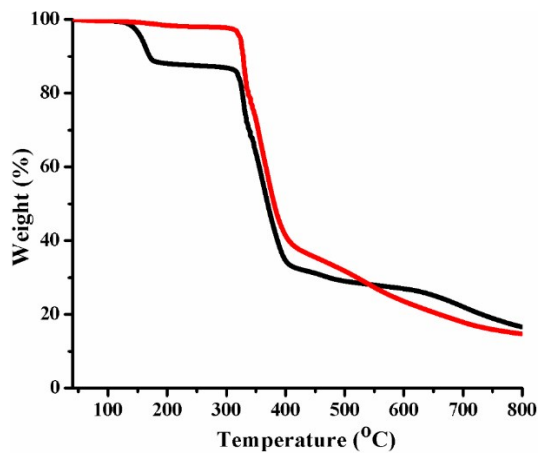

**Figure S5:** TGA of as-synthesized (black) and after gas adsorption (red) **1**.

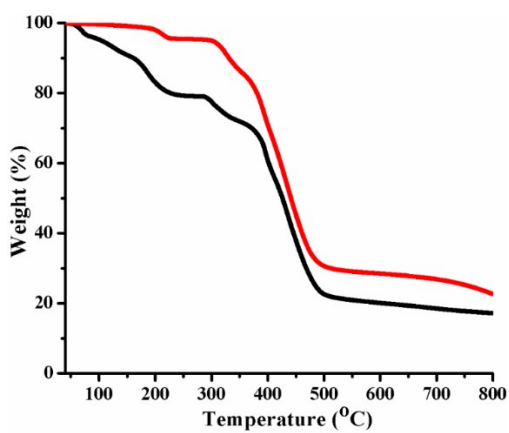

**Figure S6:** TGA of as-synthesized (black) and after gas adsorption (red) **2**.

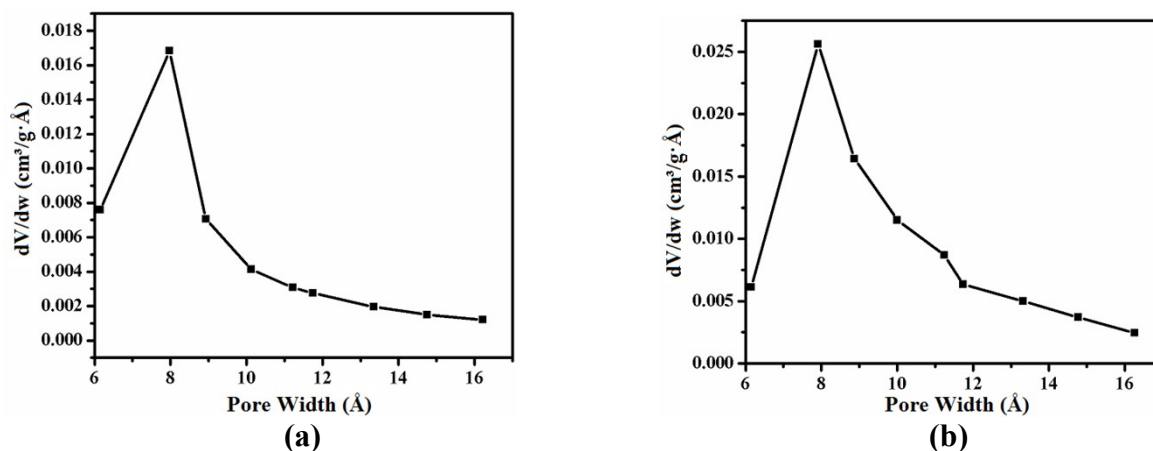

**Figure S7:** The pore size distributions for **1** (a) and **2** (b) derived from the 195 K CO<sub>2</sub> isotherms by applying Horvath-Kawazoe analysis.

### Calculation of Isothermic Heats of Adsorption:

The isothermic heats of adsorption ( $Q_{st}$ ) were calculated using the Clausius-Clapeyron equation based on pure-component isotherms collected at two different temperatures of 273 K and 295 K.

The  $Q_{st}$  was defined as

$$Q_{st} = -R \left( \frac{\partial \ln x}{\partial \left( \frac{1}{T} \right)} \right)_y$$

Where  $x$  is the pressure,  $T$  is the temperature,  $R$  is the gas constant and  $y$  is the adsorption amount. These calculations are done through the “Heat of Adsorption” function embedded in the software supplied by Micromeritics 3- Flex Surface Characterization Analyzer.

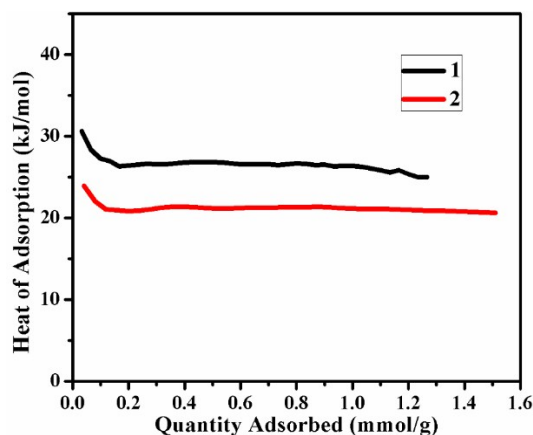

**Figure S8:** Isothermic heat of CO<sub>2</sub> ( $Q_{st}$ ) of **1** and **2**.

**Table S4:**  $Q_{st}$  data for CO<sub>2</sub> adsorption of some selected MOFs.

| MOFs                                     | $Q_{st}$ (kJ/mol) | Reference        |
|------------------------------------------|-------------------|------------------|
| <b>1</b>                                 | <b>30.6</b>       | <b>This work</b> |
| <b>2</b>                                 | <b>24</b>         | <b>This work</b> |
| [Cu(Me-4pytrz-ia)]                       | 30                | 3(a)             |
| PCN-88                                   | 27                | 3(b)             |
| Cu-TPBTM                                 | 26                | 3(c)             |
| [Co <sub>2</sub> Cl <sub>2</sub> (bbta)] | 28                | 3(d)             |
| ZTF-1                                    | 25.4              | 3(e)             |
| SIFSIX-1-Cu                              | 27                | 3(f)             |
| SIFSIX-2-Cu                              | 21                | 3(f)             |
| [Cu(bcppm)H <sub>2</sub> O]              | 29                | 3(g)             |
| IITKGP-5                                 | 22.6              | 3(h)             |
| IITKGP-6                                 | 23                | 3(i)             |
| HHU-3                                    | 24.6              | 3(j)             |
| HHU-5                                    | 25.6              | 3(j)             |
| NOTT-125                                 | 25.35             | 3(j)             |
| ZJNU-54                                  | 24.7              | 3(j)             |
| ZJU-8                                    | 21.9              | 3(j)             |
| UTSA-5                                   | 28.1              | 3(k)             |
| UTSA-49                                  | 27                | 3(l)             |
| IPM-MOF-110                              | 32                | 3(m)             |
| JUC-141                                  | 27.85             | 3(n)             |
| ZIF-78                                   | 29                | 3(o)             |

### Calculation of CO<sub>2</sub>/N<sub>2</sub> and CO<sub>2</sub>/CH<sub>4</sub> Selectivity (IAST Selectivity):

Adsorption isotherms and gas selectivities of mixed CO<sub>2</sub>/N<sub>2</sub> (15:85) and CO<sub>2</sub>/CH<sub>4</sub> (50:50) at different temperatures were calculated based on the ideal adsorbed solution theory (IAST) proposed by Myers and Prausnitz.<sup>4</sup> In order to calculate the selective sorption performance of **1** and **2** toward the separation of binary mixed gases, the parameters fitted from the single-component CO<sub>2</sub>, CH<sub>4</sub> and N<sub>2</sub> adsorption isotherms based on the dual-site Langmuir–Freundlich (DSLFL) model and were used in the IAST calculations as given below in detail.<sup>5</sup>

$$y = \frac{q_{m1}b_1x^{1/n_1}}{1 + b_1x^{1/n_1}} + \frac{q_{m2}b_2x^{1/n_2}}{1 + b_2x^{1/n_2}}$$

Where  $x$  is the pressure of the bulk gas at equilibrium with the adsorbed phase (kPa);  $y$  is the adsorbed amount per mass of adsorbent (mmol/g),  $q_{m1}$  and  $q_{m2}$  are the saturation capacities of sites 1 and 2 (mmol/g);  $b_1$  and  $b_2$  are the affinity coefficients of sites 1 and 2 (1/kPa),  $n_1$  and  $n_2$  represent the deviations from an ideal homogeneous surface. The fitting parameters of DSLFL equation are listed in Table S5-S6.

The predicted adsorption selectivity is defined as

$$S = \left( \frac{x_1}{y_1} \right) \left( \frac{x_2}{y_2} \right)$$

Where  $x_i$  and  $y_i$  are the mole fractions of component  $i$  ( $i = 1, 2$ ) in the adsorbed and bulk phases, respectively. The IAST calculations were carried out for a binary mixture containing 15% CO<sub>2</sub> ( $y_1$ ) and 85% N<sub>2</sub> ( $y_2$ ), which is typical of flue gases and for a binary mixture containing 50% CO<sub>2</sub> ( $y_1$ ) and 50% CH<sub>4</sub> ( $y_2$ ), which is typical of landfill gases.

**Table S5:** Equation parameters for the DSLFL isotherm model of **1**.

| Adsorbates             | $q_{m1}$ (mmol/g) | $b_1$ (1/kPa) | $n_1$   | $q_{m2}$ (mmol/g) | $b_2$ (1/kPa) | $n_2$   |
|------------------------|-------------------|---------------|---------|-------------------|---------------|---------|
| CO <sub>2</sub> (273K) | 0.3652            | 0.00448       | 0.97898 | 1.49765           | 0.0618        | 0.91894 |
| CH <sub>4</sub> (273K) | 1.62863           | 0.0012        | 0.7229  | 0.11899           | 0.05085       | 0.7739  |
| N <sub>2</sub> (273K)  | 1.17985           | 0.00102       | 0.88918 | 0.01391           | 1.66033E-30   | 0.0686  |



|                        |         |             |         |         |            |         |
|------------------------|---------|-------------|---------|---------|------------|---------|
| CO <sub>2</sub> (295K) | 0.51    | 1.55704E-18 | 0.98    | 1.69899 | 0.02374    | 0.9672  |
| CH <sub>4</sub> (295K) | 0.15882 | 0.03144     | 0.90095 | 1.27772 | 2.96783E-4 | 0.6075  |
| N <sub>2</sub> (295K)  | 0.26296 | 1.47856E-4  | 0.59325 | 0.02079 | 0.00188    | 0.53862 |

**Table S6:** Equation parameters for the DSLF isotherm model of **2**.

| Adsorbates             | q <sub>m1</sub><br>(mmol/g) | b <sub>1</sub><br>(1/kPa) | n <sub>1</sub> | q <sub>m2</sub><br>(mmol/g) | b <sub>2</sub><br>(1/kPa) | n <sub>2</sub> |
|------------------------|-----------------------------|---------------------------|----------------|-----------------------------|---------------------------|----------------|
| CO <sub>2</sub> (273K) | 1.96724                     | 0.00709                   | 0.97489        | 1.16623                     | 0.06025                   | 0.92714        |
| CH <sub>4</sub> (273K) | 1.64608                     | 0.00682                   | 0.89879        | 0.19425                     | 0.0579                    | 0.88992        |
| N <sub>2</sub> (273K)  | 1.18208                     | 0.00261                   | 0.94672        | 0.00472                     | 2.60513E-30               | 0.06198        |
| CO <sub>2</sub> (295K) | 1.87897                     | 0.00519                   | 0.9454         | 0.90519                     | 0.03627                   | 0.94899        |
| CH <sub>4</sub> (295K) | 3.00578                     | 4.77937E-4                | 0.97268        | 1.44787                     | 0.00773                   | 0.98839        |
| N <sub>2</sub> (295K)  | 0.7102                      | 6.71552E-4                | 0.7296         | 0.04865                     | 0.02482                   | 0.88512        |

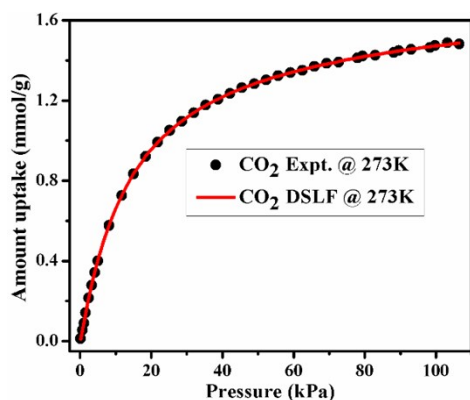

(a)

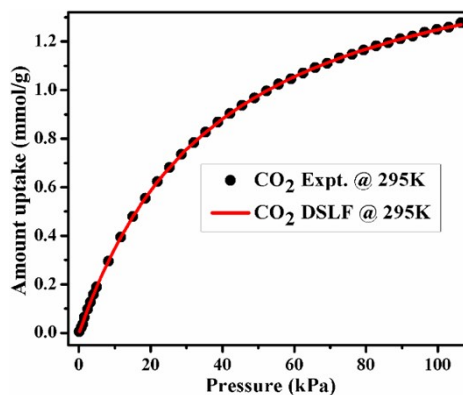

(b)

**Figure S9:** Dual-site Langmuir-Freundlich fitting (red line) for CO<sub>2</sub> (black circle) isotherms measured at 273 K (a) and 295 K (b) of **1**.

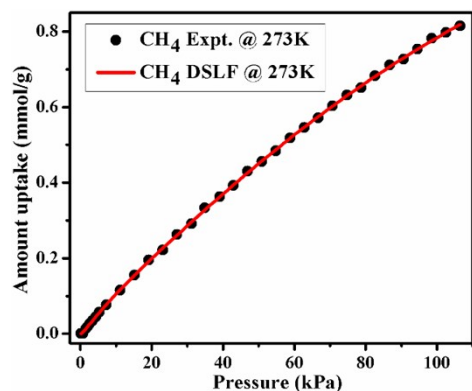

(a)

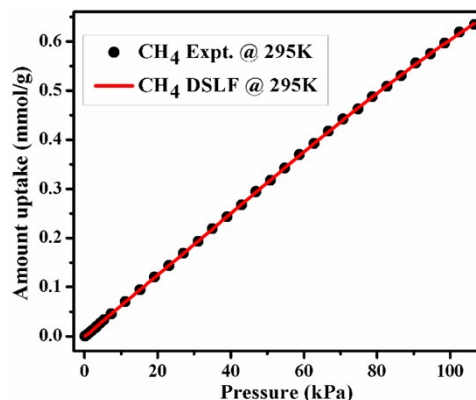

(b)

**Figure S10:** Duel-site Langmuir-Freundlich fitting (red line) for CH<sub>4</sub> (black circle) isotherms measured at 273 K (a) and 295 K (b) of 1.

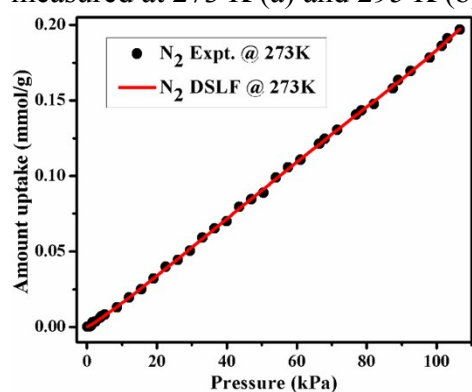

(a)

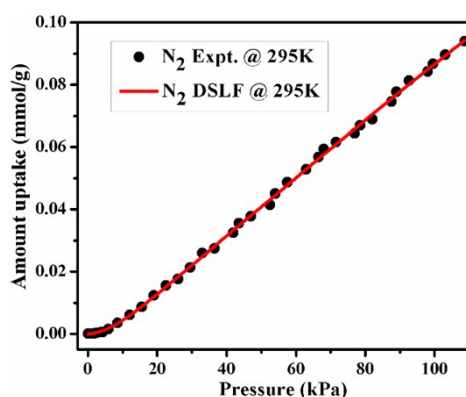

(b)

**Figure S11:** Duel-site Langmuir-Freundlich fitting (red line) for N<sub>2</sub> (black circle) isotherms measured at 273 K (a) and 295 K (b) of 1.

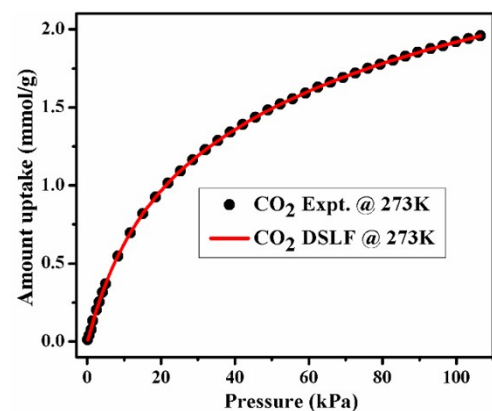

(a)

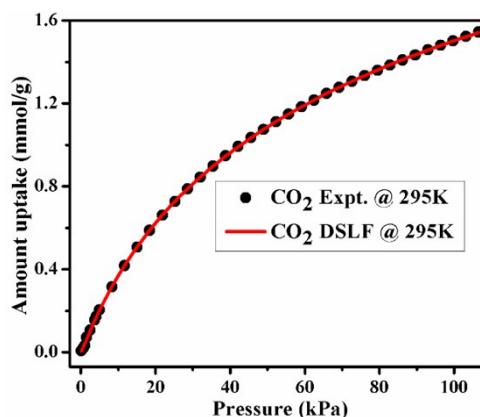

(b)

**Figure S12:** Duel-site Langmuir-Freundlich fittings (red line) for CO<sub>2</sub> (black circle) isotherms measured at 273 K (a) and 295 K (b) of 2.

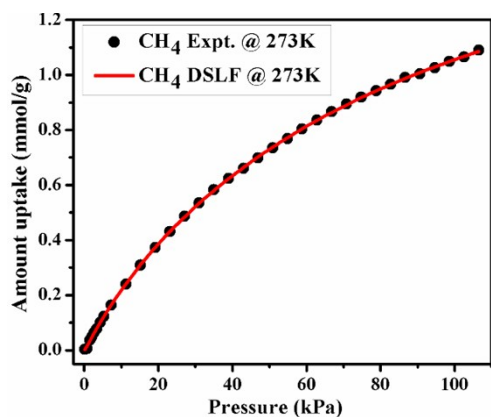

(a)

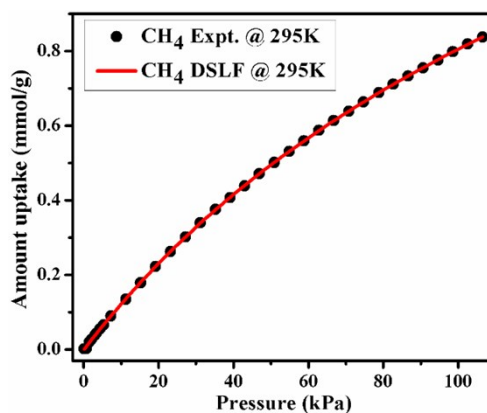

(b)

**Figure S13:** Dual-site Langmuir-Freundlich fitting (red line) for CH<sub>4</sub> (black circle) isotherms measured at 273 K (a) and 295 K (b) of **2**.

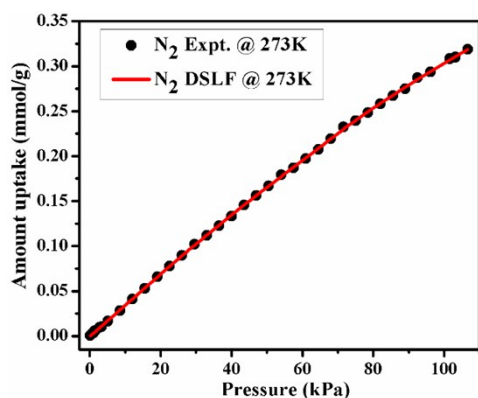

(a)

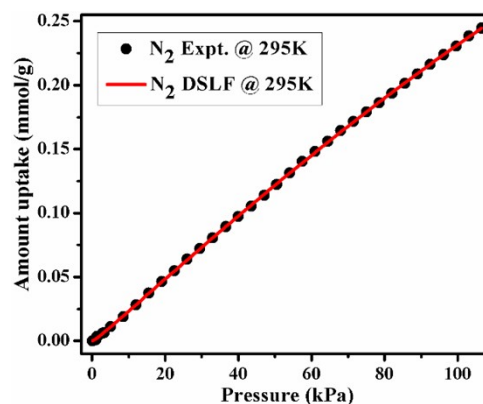

(b)

**Figure S14:** Dual-site Langmuir-Freundlich fitting (red line) for N<sub>2</sub> (black circle) isotherms measured at 273 K (a) and 295 K (b) of **2**.

**Table S7:** Adsorption selectivity of reported MOFs for CO<sub>2</sub>/N<sub>2</sub> (15:85) and CO<sub>2</sub>/CH<sub>4</sub> (50:50) at 1 bar (a: IAST selectivity; b: selectivity from Henry's Law; c: From slopes of adsorption isotherms at low pressure).

| Compound | CO <sub>2</sub> /N <sub>2</sub><br>adsorption<br>selectivity | CO <sub>2</sub> /CH <sub>4</sub><br>adsorption<br>selectivity | Temperature<br>(K) | Reference        |
|----------|--------------------------------------------------------------|---------------------------------------------------------------|--------------------|------------------|
| <b>1</b> | <b>51<sup>a</sup></b>                                        | <b>7.3<sup>a</sup></b>                                        | <b>273</b>         | <b>This work</b> |
|          | <b>75.7<sup>a</sup></b>                                      | <b>5<sup>a</sup></b>                                          | <b>295</b>         | <b>This work</b> |
| <b>2</b> | <b>27.6<sup>a</sup></b>                                      | <b>4.1<sup>a</sup></b>                                        | <b>273</b>         | <b>This work</b> |
|          | <b>18.4<sup>a</sup></b>                                      | <b>3.4<sup>a</sup></b>                                        | <b>295</b>         | <b>This work</b> |

|                                           |                     |                      |     |      |
|-------------------------------------------|---------------------|----------------------|-----|------|
| <b>SIFSIX-2-Cu</b>                        | 13.7 <sup>a</sup>   | 5.3 <sup>a</sup>     | 298 | 6(a) |
| <b>SIFSIX-1-Cu</b>                        | 27 <sup>a</sup>     | 11 <sup>a</sup>      | 298 | 6(a) |
| <b>TIFSIX-1-Cu</b>                        | 30 <sup>a</sup>     | 11 <sup>a</sup>      | 298 | 6(b) |
| <b>SNFSIX-1-Cu</b>                        | 22 <sup>a</sup>     | 12 <sup>a</sup>      | 298 | 6(b) |
| <b>PCN-88</b>                             | 18 <sup>a</sup>     | 5 <sup>a</sup>       | 296 | 6(c) |
| <b>PCN-61</b>                             | 15 <sup>a</sup>     |                      | 298 | 3(c) |
| <b>Cu<sub>24</sub>(TPBTM)<sub>8</sub></b> | 22 <sup>a</sup>     |                      | 298 | 3(c) |
| <b>ZJNU-44a</b>                           | 15 <sup>a</sup>     | 5.5 <sup>a</sup>     | 296 | 6(d) |
| <b>UTSA-72a</b>                           | 48.3 <sup>a</sup>   |                      | 273 | 6(e) |
|                                           | 35.6 <sup>a</sup>   |                      | 296 |      |
| <b>UTSA-85a</b>                           | 55 <sup>a</sup>     |                      | 273 | 6(f) |
|                                           | 62.5 <sup>a</sup>   |                      | 296 |      |
| <b>PMOF-3a</b>                            | 29.2 <sup>a</sup>   | 8 <sup>a</sup>       | 273 | 6(g) |
|                                           | 23.4 <sup>a</sup>   | 5.1 <sup>a</sup>     | 296 |      |
| <b>JUC-141</b>                            | 21.62 <sup>a</sup>  | 4.20 <sup>a</sup>    | 273 | 3(n) |
|                                           | 27.60 <sup>a</sup>  | 8.72 <sup>a</sup>    | 298 |      |
| <b>Zn-MOF-74</b>                          |                     | 5 <sup>a</sup>       | 296 | 6(h) |
| <b>MOF-177</b>                            | 3.6 <sup>a</sup>    |                      | 296 | 6(h) |
| <b>Cu-BTTri</b>                           | 21 <sup>a</sup>     |                      | 298 | 6(i) |
| <b>en-Cu-BTTri</b>                        | 25 <sup>a</sup>     |                      | 298 | 6(i) |
| <b>NOTT-202a</b>                          | 26.7 <sup>b</sup>   | 2.9 <sup>b</sup>     | 273 | 6(j) |
|                                           | 4.3 <sup>b</sup>    | 1.4 <sup>b</sup>     | 293 |      |
| <b>ZIF-68</b>                             | 18.7 <sup>c</sup>   | 5 <sup>c</sup>       | 298 | 3(o) |
| <b>ZIF-69</b>                             | 19.9 <sup>c</sup>   | 5.1 <sup>c</sup>     | 298 | 3(o) |
| <b>ZIF-70</b>                             | 17.3 <sup>c</sup>   | 5.2 <sup>c</sup>     | 298 | 3(o) |
| <b>ZIF-79</b>                             | 23.2 <sup>c</sup>   | 5.4 <sup>c</sup>     | 298 | 3(o) |
| <b>ZIF-81</b>                             | 23.8 <sup>c</sup>   | 5.7 <sup>c</sup>     | 298 | 3(o) |
| <b>ZIF-95</b>                             | 18±1.7 <sup>c</sup> | 4.3±0.4 <sup>c</sup> | 298 | 3(o) |

## References:

1. Bruker, SMART and SAINT (Bruker AXS Inc, Madison, Wisconsin, 2007).
2. Platon Program: A. L. Spek, *Acta Crystallogr., Sect. A* 1990, **46**, 194.
3. (a) D. Lässig, J. Lincke, J. Moellmer, C. Reichenbach, A. Moeller, R. Gläser, G. Kalies, K. A. Cychosz, M. Thommes, R. Staudt and H. Krautscheid, *Angew. Chem., Int. Ed.*, 2011, **50**, 10344–10348; (b) J.-R. Li, J. Yu, W. Lu, L.-B. Sun, J. Sculley, P. B. Balbuena and H.-C. Zhou, *Nat. Commun.*, 2012, **4**, 1538; (c) B. Zheng, J. Bai, J. Duan, L. Wojtas and M. J. Zaworotko, *J. Am. Chem. Soc.*, 2011, **133**, 748-751; (d) P.-Q. Liao, H. Chen, D.-D. Zhou, S.-Y. Liu, C.-T. He, Z. Rui, H. Ji, J.-P. Zhang and X.-M. Chen, *Energy Environ. Sci.*, 2015, **8**, 1011–1016; (e) T. Panda, P. Pachfule, Y. Chen, J. Jiang and R. Banerjee, *Chem. Commun.*, 2011, **47**, 2011-2013; (f) S. D. Burd, S. Ma, J. A. Perman, B. J. Sikora, R. Q. Snurr, P. K. Thallapally, J. Tian, L. Wojtas, M. J. Zaworotko, *J. Am. Chem. Soc.* 2012, **134**, 3663–3666; (g) W. M. Bloch, R. Babarao, M. R. Hill, C. J. Doonan and C. J. Sumbly, *J. Am. Chem. Soc.*, 2013, **135**, 10441–10448; (h) A. Pal, S. Chand, S. M. Elahi and M. C. Das, *Dalton Trans.*, 2017, **46**, 15280-15286; (i) A. Pal, S. Chand and M. C. Das, *Inorg. Chem.*, 2017, **56**, 13991-13997; (j) Z. Lu, F. Meng, L. Du, W. Jiang, H. Cao, J. Duan, H. Huang and H. He, *Inorg. Chem.*, 2018, DOI: 10.1021/acs.inorgchem.8b02031; (k) G. Chen, Z. Zhang, S. Xiang and B. Chen, *CrystEngComm*, 2013, **15**, 5232–5235; (l) S. Xiong, Y. Gong, H. Wang, H. Wang, Q. Liu, M. Gu, X. Wang, B. Chen and Z. Wang, *Chem. Commun.* 2014, **50**, 12101-12104; (m) S. Mukherjee, R. Babarao, A. V. Desai, B. Manna and S. K. Ghosh, *Cryst. Growth Des.*, 2017, **17**, 3581-3587; (n) N. Zhao, F. Sun, P. Li, X. Mu and G. Zhu, *Inorg. Chem.*, 2017, **56**, 6938-6942; (o) A. Phan, C. J. Doonan, F. J. Uribe-Romo, C. B. Knobler, M. O’Keeffe and O. M. Yaghi, *Acc. Chem. Res.*, 2010, **43**, 58-67.
4. A. L. Myers and J. M. Prausnitz, *AIChE J.*, 1965, **11**, 121.
5. B. Li, Y. Zhang, R. Krishna, K. Yao, Y. Han, Z. Wu, D. Ma, Z. Shi, T. Pham, B. Space, J. Liu, P. K. Thallapally, J. Liu, M. Chrzanowski and S. Ma, *J. Am. Chem. Soc.*, 2014, **136**, 8654.
6. (a) P. Nugent, Y. Belmabkhout, S. D. Burd, A. J. Cairns, R. Luebke, K. Forrest, T. Pham, S. Ma, B. Space, L. Wojtas, M. Eddaoudi and M. J. Zaworotko, *Nature*, 2013, **495**, 80-84; (b) P. Nugent, V. Rhodus, T. Pham, B. Tudor, K. Forrest, L. Wojtas, B. Space and M. Zaworotko, *Chem. Commun.*, 2013, **49**, 1606-1608; (c) J. -R. Li, J. Yu, W. Lu, L.-B. Sun, J. Sculley, P. B. Balbuena and H.-C. Zhou, *Nat. Commun.*, 2013, **4**, 204-212; (d) C. Song, J. Hu, Y. Ling, Y. L. Feng, R. Krishna, D. Chen and Y. He, *J. Mater. Chem. A*, 2015, **3**, 19417-19426; (e) H. Alawisi,

B. Li, Y. He, H. D. Arman, A. M. Asiri, H. Wang and B. Chen, *Cryst. Growth Des.*, 2014, **14**, 2522-2526; (f) O. Alduhaish, H. Wang, B. Li, H. D. Arman, V. Nesterov, K. Alfooty and B. Chen, *ChemPlusChem*, 2016, **81**, 764-769; (g) O. Alduhaish, H. Wang, B. Li, T. -L. Hu, H. D. Arman, K. Alfooty and B. Chen, *ChemPlusChem*, 2016, **81**, 770-774; (h) S. Xiang, Y. He, Z. Zhang, H. Wu, W. Zhou, R. Krishna and B. Chen, *Nat. Commun.*, 2012, **3**, 954-963; (i) A. Demessence, D. M. D'Alessandro, M. L. Foo and J. R. Long, *J. Am. Chem. Soc.*, 2009, **131**, 8784-8786; (j) S. Yang, X. Lin, W. Lewis, M. Suyetin, E. Bichoutskaia, J. E. Parker, C. C. Tang, D. R. Allan, P. J. Rizkallah, P. Hubberstey, N. R. Champness, K. M. Thomas, A. J. Blake and M. Schröder, *Nat. Mater.*, 2012, **11**, 710-716.
